# Supplementary material for: Chemi-Inspired Silicon Allotropes—Experimentally Accessible Si9 Cages as Proposed Building Block for 1D Polymers, 2D Sheets, Single-Walled Nanotubes, and Nanoparticles
Source: MDPI journal article supplement (doi:10.3390/molecules27030822), 2022-01-26
Supplement: s1 [file s1]

## Supplementary Materials for

### Chemi-inspired silicon allotropes – experimentally accessible Si<sub>9</sub> cages as proposed building block for 1D polymers, 2D sheets, single-walled nanotubes, and nanoparticles

Laura-Alice Jantke, Antti J. Karttunen, Thomas F. Fässler

#### Contents of the Supplementary Materials

1. Tubular one-dimensional modifications derived from  $\{\infty[\text{Si}_9]_n\}$  (L1)
2. Layer with  $\{\text{Si}_9\}$  clusters on top of each other connected via  $\text{sp}^3$ -Si linkers
3. Population analyses for the basic  $[\text{Si}_9]^{4-}$  unit in comparison to  $[\text{Ge}_9]^{4-}$
4. Band structures and density of state (DOS) maps for considered one- and two-dimensional Si modifications
5. Structural data of the studied structures

## 1. Tubular one-dimensional modifications derived from $\{\infty^2[\text{Si}_9]_n\}$ (**L1**)

Sheet **L1** is rolled up to tubes, just like reported for Ge<sub>9</sub> before.<sup>1</sup> The rolling bases on the same unit cell as the layer itself, and **L1** is rolled up to tubes **T** that close after *m* units *n* (compare Figure S1a). The smallest considered tube  $\{\infty^1[\text{Si}_9]_{4n}\}$  (**T<sub>4n</sub>**) completes a ring after eight Si<sub>9</sub> clusters pointing to the inside and outside, respectively. It is the smallest diameter permitting the inner clusters to co-exist without coordinating each other (Figure S1b). This small tube shows a relative energy of  $\Delta E = 0.00$  eV per atom identical to the relative energy of the sheet itself. Thus, rolling puts no significant additional strain to the structure, even though the diameter is quite small (5.30 Å and 21.66 Å for the inner and outer diameter, respectively, Table S1). Structurally, the clusters stay more or less equal to the ones in **L1**, but the *inter*-cluster distances are slightly enlarged to 2.31 Å and 2.32 Å along and perpendicular to the translational direction of the tube, respectively (Table S1).

The largest tube  $\{\infty^1[\text{Si}_9]_{6n}\}$  (**T<sub>6n</sub>**) is closed after 12 clusters (Figure S1e). It shows a slightly higher relative energy of 0.01 eV per atom, which is identical to the finding for Ge (structural parameters are in Table S1).

Two further nanotubes were studied, namely  $\{\infty^1[\text{Si}_9]_{8n}\}$  (**T<sub>8n</sub>**, Figure S1c) and  $\{\infty^1[\text{Si}_9]_{12n}\}$  (**T<sub>12n</sub>**, Figure S1d) with relative energies in the range of the other allotropes derived from **L1** (Table S1). Unlike for Ge, for Si **T<sub>8n</sub>** represents a stable modification with a tube with a square-shaped cross-section.

**Table S1.** Structural and electronic properties of tubes derived from L1 (compare Figure S1 and main text).

| No.                    | formula                                                         | symmetry<br>(of {Si <sub>9</sub> }) | bond analysis (compare Figure S1)/Å |                              |                              |                              |                                           | <i>d</i> 1/ <i>d</i> 2       | diameter/Å                     | $\Delta E/\text{eV}$<br>per atom | band<br>gap/eV |
|------------------------|-----------------------------------------------------------------|-------------------------------------|-------------------------------------|------------------------------|------------------------------|------------------------------|-------------------------------------------|------------------------------|--------------------------------|----------------------------------|----------------|
|                        |                                                                 |                                     | I                                   | II                           | III                          | IV                           | V                                         |                              |                                |                                  |                |
| <b>T<sub>4n</sub></b>  | { <sup>1</sup> <sub>∞</sub> [Si <sub>9</sub> ] <sub>4n</sub> }  | <i>p4mm</i>                         | 2.37i,<br>2.36°                     | 2.51 <sup>i</sup> ,<br>2.48° | 2.66 <sup>i</sup> ,<br>2.72° | 2.49 <sup>i</sup> ,<br>2.50° | 2.31 <sup>⊥</sup> ,<br>2.32 <sup>  </sup> | 1.11 <sup>i</sup> ,<br>1.04° | 5.30 <sup>i</sup> ,<br>21.66°  | 0.00                             | 0.87           |
| <b>T<sub>6n</sub></b>  | { <sup>1</sup> <sub>∞</sub> [Si <sub>9</sub> ] <sub>6n</sub> }  | <i>p6mm</i>                         | 2.36 <sup>i</sup> ,<br>2.37°        | 2.50 <sup>i</sup> ,<br>2.48° | 2.65 <sup>i</sup> ,<br>2.69° | 2.49 <sup>i</sup> ,<br>2.50° | 2.31 <sup>⊥</sup> ,<br>2.32 <sup>  </sup> | 1.07 <sup>i</sup> ,<br>1.03° | 12.66 <sup>i</sup> ,<br>28.88° | 0.01                             | 1.84           |
| <b>T<sub>8n</sub></b>  | { <sup>1</sup> <sub>∞</sub> [Si <sub>9</sub> ] <sub>8n</sub> }  | <i>p4mm</i>                         | 2.36 <sup>i</sup> ,<br>2.36°        | 2.50 <sup>i</sup> ,<br>2.48° | 2.67 <sup>i</sup> ,<br>2.70° | 2.49 <sup>i</sup> ,<br>2.50° | 2.31 <sup>  </sup> ,<br>2.31 <sup>⊥</sup> | 1.05 <sup>i</sup> ,<br>1.03° | 16.48 <sup>i</sup> ,<br>37.25° | 0.00                             | 1.26           |
| <b>T<sub>12n</sub></b> | { <sup>1</sup> <sub>∞</sub> [Si <sub>9</sub> ] <sub>12n</sub> } | <i>p6mm</i>                         | 2.36i,<br>2.36°                     | 2.49i,<br>2.49°              | 2.66i,<br>2.69°              | 2.49i,<br>2.50°              | 2.31 <sup>  </sup> ,<br>2.31 <sup>⊥</sup> | 1.03i,<br>1.02°              | 33.78i,<br>50.17°              | 0.01                             | 2.39           |

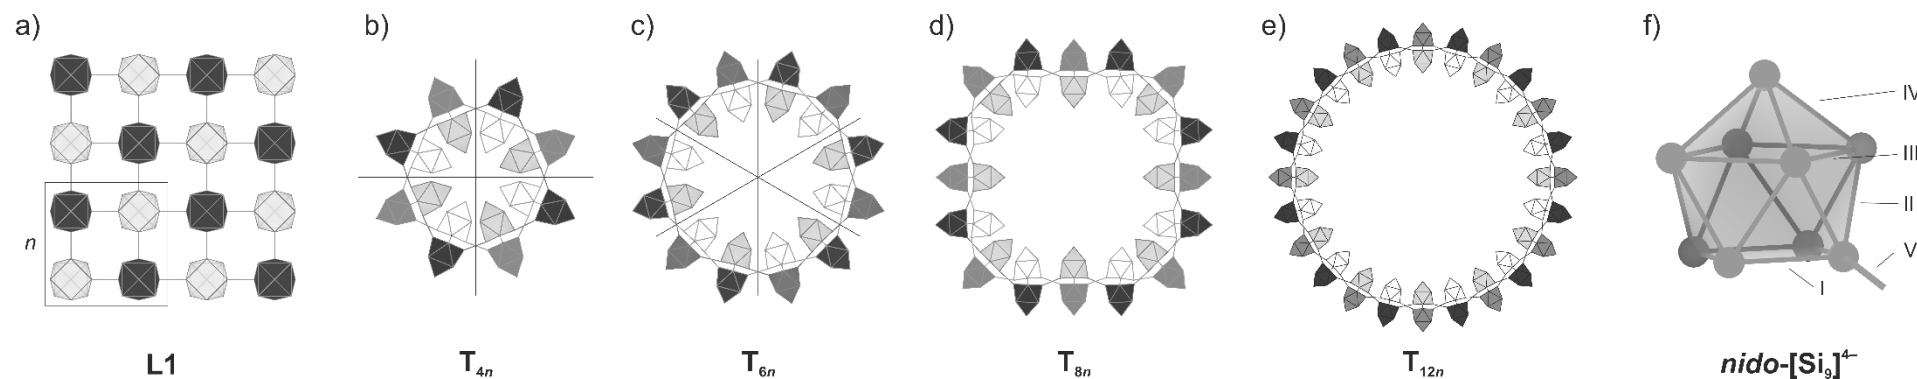

**Figure S1.** Tubes derived from rolling *m* units *n* of L1. a) 2 × 2 section of L1; the unit cell is highlighted with a box. b) T<sub>4n</sub> closing after 4 unit cells. c) T<sub>6n</sub> closing after 6 unit cells. d) T<sub>8n</sub> closing after 8 unit cells. e) T<sub>12n</sub> closing after 12 unit cells. f) Building block for the construction of L1 and of all tubes, nido-[Si<sub>9</sub>]<sup>4-</sup>. The different bond lengths displayed in Table S1 refer to the labels in this figure.

## 2. Layer with {Si<sub>9</sub>} clusters on top of each other and connected via sp<sup>3</sup>-Si linkers

The layer with opposing Si<sub>9</sub> clusters,  $\{\infty^2([Si_9]_2-Si_2)_n\}^{on-top}$  (**L3**), shows clusters with  $C_4$  symmetry in layer group  $p422$ . For this structure, the deformation of the building block *nido*-[Si<sub>9</sub>]<sup>4-</sup> is comparable to that in **L1** and **L2** (main text) with slightly larger distances within the open square (2.38 Å, Table S2). The relative energy of this structure exposing the linking Si atoms to highly strained bond angles (94.2° to 148.2°) is highest in energy of all considered layers with a value of  $\Delta E = 0.05$  eV per atom. We thus conclude that the direct connection of Si<sub>9</sub> units is more favorable than the maximal deformation of the bonding orbitals of a sp<sup>3</sup>-hybridized Si atom. The (indirect) band gap of **L3** is 0.65 eV per atom respectively (full band structures and density of states below).

**Table S2.** Structural analysis of **L3** (Figure S2).

| No.       | bond analysis (compare Figure S1)/Å |                   |      |      |      |         |
|-----------|-------------------------------------|-------------------|------|------|------|---------|
|           | I                                   | II                | III  | IV   | V    | $d1/d2$ |
| <b>L3</b> | 2.38                                | 2.50 <sup>#</sup> | 2.77 | 2.51 | 2.36 | 1.00    |

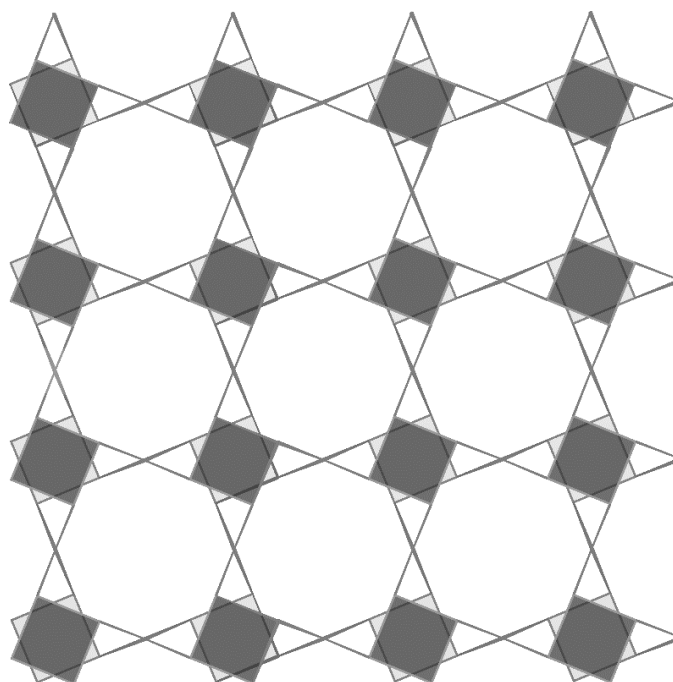

**Figure S2.** Schematic representation of layer L3. The grey and white squares represent {Si<sub>9</sub>} clusters above and below the plane, respectively, spanned by the sp<sup>3</sup>-hybridized Si atom linkers (grey frame).

### 3. Population analyses for the basic $[\text{Si}_9]^{4-}$ unit in comparison to $[\text{Ge}_9]^{4-}$

**Table S3.** Partial atomic charges from natural population analysis (NPA) and Hirshfeld analysis. The label **a** refers to the open square, **b** to the capped square and **c** to the cap (Figure next to the table). All values are given per atom. The values denoted with \* are averaged.

|   | NPA/ $e^-$           |                      | Hirshfeld/ $e^-$     |                      | 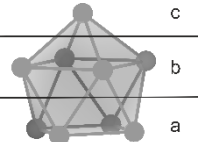 |
|---|----------------------|----------------------|----------------------|----------------------|------------------------------------------------------------------------------------|
|   | $[\text{Si}_9]^{4-}$ | $[\text{Ge}_9]^{4-}$ | $[\text{Si}_9]^{4-}$ | $[\text{Ge}_9]^{4-}$ |                                                                                    |
| a | -0.50*               | -0.51                | -0.48*               | -0.48*               |                                                                                    |
| b | -0.36*               | -0.35                | -0.40                | -0.40                |                                                                                    |
| c | -0.54                | -0.55                | -0.48                | -0.49                |                                                                                    |

Even though absolute values of the partial charges have no experimentally observable counterparts, the relative values can be considered for an evaluation of the reactions that these clusters may undertake. It can be seen that the open square, which plays a key part in our theoretical investigations, has the higher partial charge than the capped square for both elements Si and Ge.

#### 4. Band structures and density of state (DOS) maps for considered one- and two-dimensional Si modifications

For all calculated two- and one-dimensional structures, we performed band structure and DOS calculations with CRYSTAL.

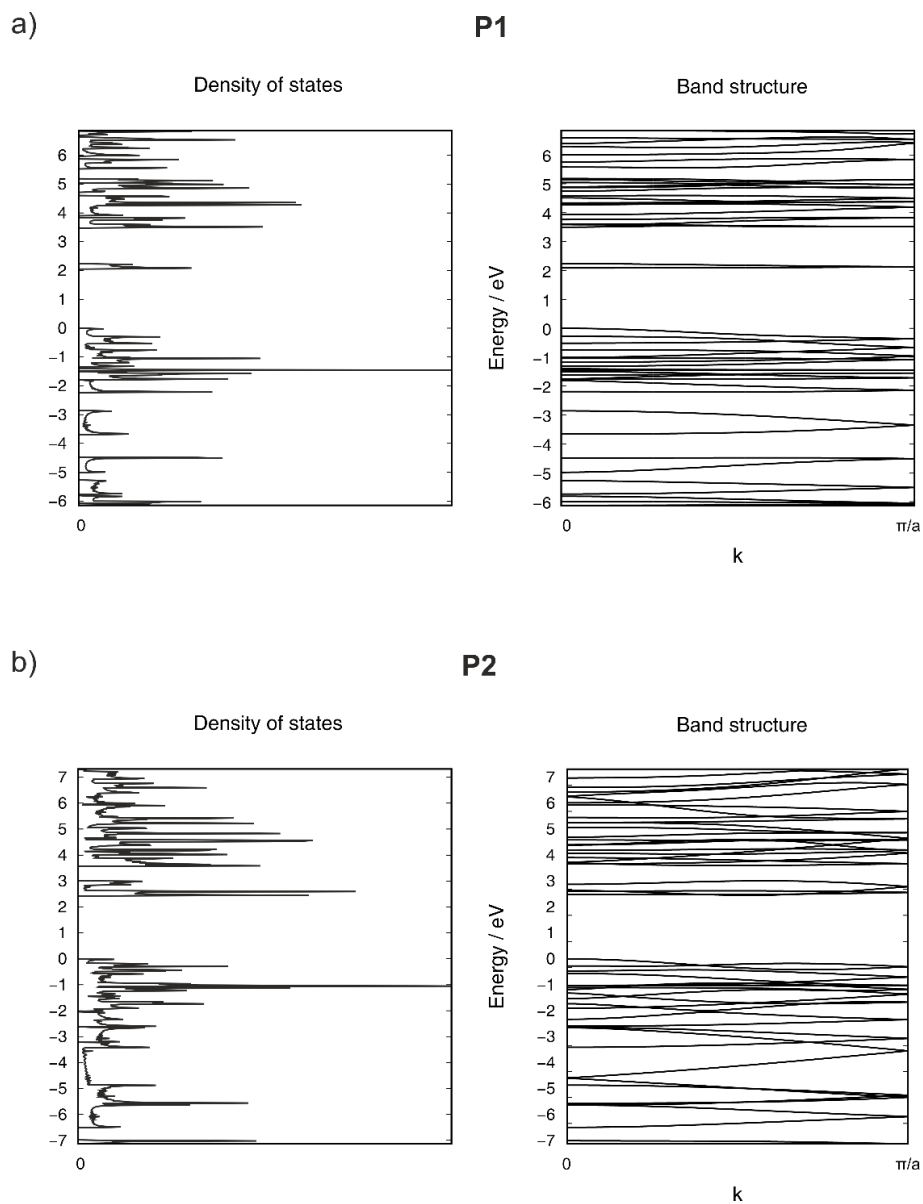

**Figure S3.** Band Structures and DOSs of polymers P1 and P2.

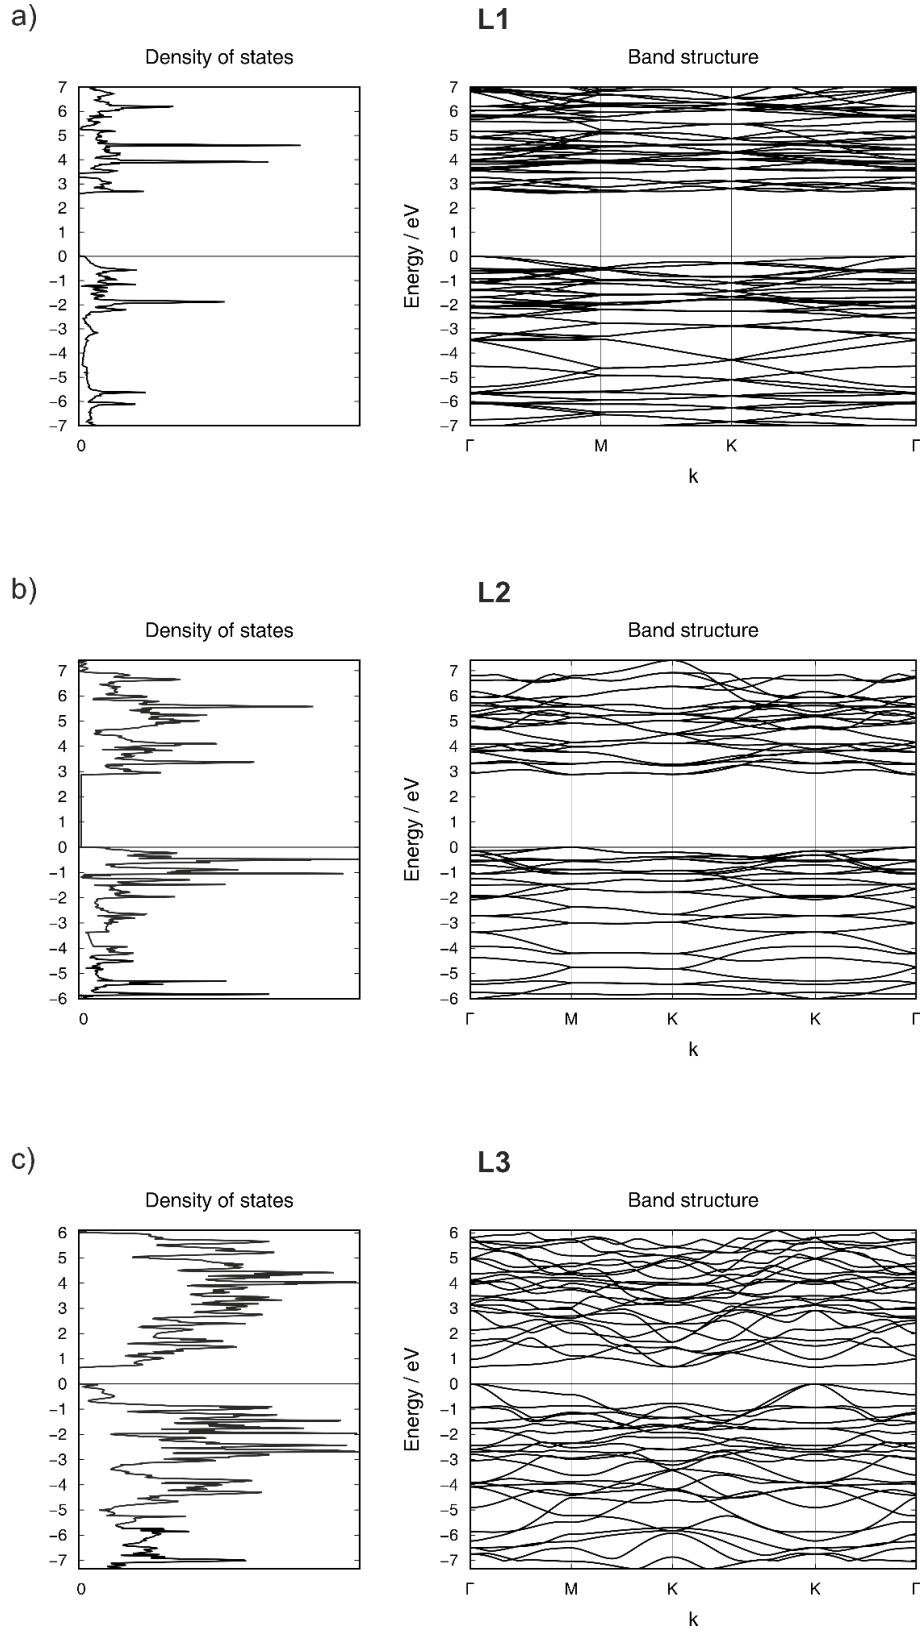

**Figure S4.** Band Structures and DOSs of layers L1–L3.

## 5. Structural data of the studied structures

Structural parameters of optimized Si (and Ge) structures given in the CRYSTAL input format (or xyz coordinates for molecular systems studied with Gaussian09 program package).

| layer group number                                         | rod group number                                      | point group number                                    |
|------------------------------------------------------------|-------------------------------------------------------|-------------------------------------------------------|
| Minimal set of lattice parameters a, b, $\alpha$ , $\beta$ | Minimal set of lattice parameters a, $\alpha$         |                                                       |
| Number of non-equivalent atoms in the asymmetric unit      | Number of non-equivalent atoms in the asymmetric unit | Number of non-equivalent atoms in the asymmetric unit |
| <atomic number> < fractional x> <fractional y> <z>         | <atomic number> <fractional x> <y> <z>                | <atomic number> <x> <y> <z>                           |

### Silicene

```
72
3.85718051
1
14      -3.33333333333333E-01  3.33333333333333E-01  2.227497885518E-01
```

### Si<sub>54</sub> nanocluster

```
1
54
14      1.133920491987E+00  9.601811455037E-01  1.686318285429E+00
14     -1.201397891989E-01  3.022237828676E+00  2.710838963430E+00
14      3.902442966502E+00  5.593451656680E-01  5.219939829769E+00
14      2.810690682409E+00 -1.743005350290E-01  3.156938226153E+00
14      2.203872581381E+00  3.783326128353E+00  3.694746144071E+00
14      3.052512422696E+00  2.801446910506E+00 -7.961816263566E-02
14      4.779819926555E+00  4.389543299353E+00  5.713541344359E-01
14      3.836564683787E+00  1.563973696432E+00  1.832922926218E+00
14      6.149142916125E+00  9.378355064987E-01  1.427800044588E+00
14      5.528450162878E+00  2.962967650876E+00  2.702360664252E+00
14      9.268609353221E+00  2.049020535575E+00  3.601688106079E+00
14      7.085077154843E+00  1.101204856044E+00  3.558930879656E+00
14      6.589863803397E+00  4.338261085523E+00  4.320023343228E+00
14      6.796860907767E+00  3.077148108143E+00  5.408410172129E-01
14      8.197774742192E+00  3.788772138552E+00  2.318790042235E+00
14      1.549302600776E+00  3.965093122135E+00  1.320206856654E+00
14      1.510546049627E+00  6.305221015117E+00  1.707418205322E+00
14      2.907906066465E-01  7.124959710983E+00  3.646955355163E+00
14      5.190409143322E+00  6.306653859954E+00  4.070146369973E+00
14      3.721804738968E+00  5.301973952257E+00  2.490213103052E+00
14      2.429344041091E+00  8.167302014973E+00  3.698032973685E+00
14      3.379746958515E+00  7.515845360794E+00  1.073654326341E+00
14      3.496718259516E+00  9.587741943639E+00  2.186950348880E+00
14      5.300525409824E+00  6.651520740601E+00 -4.827254133864E-02
14      6.397331222050E+00  7.123408623259E+00  2.056838945205E+00
14      5.597832909562E+00  8.971755572673E+00  3.187126744049E+00
14      9.725527288633E+00  6.854327976146E+00  4.689445658592E+00
14      8.186653211740E+00  5.945500228021E+00  3.080119019752E+00
14      6.598717407378E+00  1.000501751723E+01  5.004630081596E+00
14      1.399981288895E+00  1.620718294953E+00  4.050541794583E+00
14      7.672935852705E-01  1.413586749025E+00  6.305070217597E+00
14      9.387169143311E-01  3.663553588839E+00  6.907765898912E+00
14      3.344449716260E+00  2.432896293791E+00  8.400760810153E+00
14      2.675537428825E+00  3.659899763797E-01  7.307931374760E+00
14      1.508433863043E+00  3.723802457871E+00  9.279616323909E+00
14      3.032149701397E+00  2.587382333583E+00  6.031956007056E+00
14      4.829115934527E+00  5.089982316496E+00  7.347023783233E+00
14      6.187077976794E+00  6.438719224872E-02  5.462560093872E+00
14      6.592865057869E+00  2.038983213073E+00  6.559528523594E+00
14      5.600755044452E+00  3.136881967828E+00  8.400402727376E+00
14      6.648537224659E+00  4.682514210328E+00  1.006221950713E+01
```

|    |                    |                    |                    |
|----|--------------------|--------------------|--------------------|
| 14 | 8.322512278813E+00 | 3.145670015343E+00 | 5.506681424780E+00 |
| 14 | 8.889925019056E+00 | 5.255386124675E+00 | 6.310820475491E+00 |
| 14 | 1.121382404716E+00 | 5.284730438784E+00 | 5.127900746057E+00 |
| 14 | 2.818795364225E+00 | 6.109978213171E+00 | 6.529180780539E+00 |
| 14 | 4.893653737171E+00 | 6.402694817319E+00 | 9.465795413716E+00 |
| 14 | 2.816403065694E+00 | 5.652755897841E+00 | 8.794553374043E+00 |
| 14 | 3.946043371995E+00 | 7.826758918900E+00 | 5.475219481122E+00 |
| 14 | 4.700485311591E+00 | 9.771959869318E+00 | 6.540845856359E+00 |
| 14 | 6.651921503330E+00 | 6.379325289724E+00 | 6.504697571102E+00 |
| 14 | 7.866093102148E+00 | 8.021626639573E+00 | 7.976136289886E+00 |
| 14 | 5.550870285272E+00 | 8.165782655068E+00 | 8.014780592918E+00 |
| 14 | 8.145692022297E+00 | 5.763367475257E+00 | 8.436385846090E+00 |
| 14 | 7.937413148632E+00 | 8.188816892168E+00 | 5.551102194679E+00 |

## S<sub>2</sub> (Si<sub>9</sub>)<sub>2</sub>

|    |                     |                     |                     |
|----|---------------------|---------------------|---------------------|
| 9  |                     |                     |                     |
| 14 | 2.360547660136E+00  | 7.159684385827E-01  | 2.619558139502E+00  |
| 14 | -1.808105055005E+00 | 9.222772046746E-02  | 3.363657466768E+00  |
| 14 | 1.236153922487E-01  | 1.928191670430E+00  | 3.204523586593E+00  |
| 14 | -7.007504786087E-01 | -2.265924154082E+00 | 2.865888457218E+00  |
| 14 | 1.325535634630E+00  | -1.396388541941E+00 | 1.508021204675E+00  |
| 14 | -1.572346589613E+00 | 1.584428891127E+00  | 1.335668628384E+00  |
| 14 | 8.107441745896E-01  | -1.039286918730E+00 | -9.136185598023E-01 |
| 14 | -1.126634800493E+00 | 8.426561128225E-01  | -1.083735331338E+00 |
| 14 | 5.871669751140E-01  | -4.361764264969E-01 | 3.849022757979E+00  |

## S<sub>3</sub> (Si<sub>9</sub>)<sub>3</sub>

|    |                     |                     |                     |
|----|---------------------|---------------------|---------------------|
| 27 |                     |                     |                     |
| 14 | 2.072834698782E+00  | 1.271018390139E+00  | 1.538173927387E+00  |
| 14 | -2.124879210009E+00 | -9.988457992205E-01 | -1.427748451701E+00 |
| 14 | -1.632716344062E+00 | 1.152882402626E+00  | 1.059505250261E+00  |
| 14 | -2.314395304023E-01 | 1.929081045551E+00  | -9.001906651906E-01 |
| 14 | 1.025977996214E-01  | -2.931635522328E+00 | 1.249922562293E+00  |
| 14 | 2.427345531548E+00  | -1.482682692171E+00 | -1.290192182217E+00 |
| 14 | 1.306745892323E-01  | 2.690050488062E+00  | 1.417805398633E+00  |
| 14 | -2.583042100754E+00 | 1.410966852238E+00  | -1.254568574415E+00 |
| 14 | 1.700388242769E+00  | -1.076116661497E+00 | 1.095609681150E+00  |
| 14 | 5.119574843010E-02  | -1.978344456669E+00 | -1.092478972032E+00 |
| 14 | -1.519252647231E+00 | -1.141669740178E+00 | 8.736369963584E-01  |
| 14 | 1.763550787193E+00  | 8.017842737641E-01  | -7.883279074686E-01 |
| 14 | 4.08006359644E+00   | -6.861357717746E-02 | 1.991834394835E+00  |
| 14 | -2.050176041996E+00 | -3.391877666268E+00 | -2.007710153560E+00 |
| 14 | -2.071991960703E+00 | 3.668136149559E+00  | 1.903918621355E+00  |
| 14 | -1.496393615428E+00 | 3.340614354003E+00  | -2.348764681209E+00 |
| 14 | -2.198913432295E+00 | -2.933827816536E+00 | 2.200427956675E+00  |
| 14 | 3.605566394269E+00  | 5.112267747061E-01  | -2.199565893057E+00 |
| 14 | 3.743441780211E+00  | -2.181117225006E+00 | 6.711937326826E-01  |
| 14 | -7.002936019659E-03 | -4.314798121815E+00 | -8.003881377720E-01 |
| 14 | -2.326309678925E-01 | 4.326606257246E+00  | -3.263803709829E-01 |
| 14 | -3.760881608448E+00 | 2.118754151976E+00  | 7.819122291563E-01  |
| 14 | -3.557321087489E+00 | -2.310040996828E+00 | 2.040203816968E-02  |
| 14 | 3.818903838351E+00  | 1.947706419887E+00  | 1.637515282292E-02  |
| 14 | 5.114645835284E+00  | -1.438203654179E-01 | -2.168972571167E-01 |
| 14 | -2.412291815741E+00 | -4.499676640033E+00 | 1.515848546427E-01  |
| 14 | -2.730789110201E+00 | 4.279836457464E+00  | -3.106896494999E-01 |

## S<sub>6</sub> (Si<sub>9</sub>)<sub>6</sub>

|    |                     |                     |                     |
|----|---------------------|---------------------|---------------------|
| 45 |                     |                     |                     |
| 3  |                     |                     |                     |
| 14 | 1.392639241185E+00  | 1.392639241185E+00  | -5.310320809098E+00 |
| 14 | 1.676185001385E+00  | 1.384675647351E-20  | -3.301183040813E+00 |
| 14 | -4.801933974376E-37 | -4.119441072941E-37 | -6.860235754815E+00 |

## S<sub>12</sub> (Si<sub>9</sub>)<sub>12</sub>

|    |                    |                     |                     |
|----|--------------------|---------------------|---------------------|
| 45 |                    |                     |                     |
| 4  |                    |                     |                     |
| 14 | 2.798608639532E+00 | 4.473491637750E+00  | -1.172994781839E+00 |
| 14 | 6.462785476067E+00 | -3.719504822795E+00 | -3.102546040290E-18 |
| 14 | 1.899609087659E+00 | 5.082121006295E+00  | 5.082121006295E+00  |
| 14 | 5.411511272584E-19 | 6.217496094246E+00  | 6.217496094246E+00  |

### S<sub>30</sub> (Si<sub>9</sub>)<sub>30</sub>

270

|    |                     |                     |                     |
|----|---------------------|---------------------|---------------------|
| 14 | -3.713155456469E+00 | -8.070017309013E+00 | 1.170912972089E-01  |
| 14 | -5.690850378240E+00 | -6.822016138660E+00 | -5.644495515902E-02 |
| 14 | -3.398843626379E+00 | -7.897148020490E+00 | -2.233063901418E+00 |
| 14 | -1.919563550036E+00 | -8.547055577943E+00 | 1.487660580992E+00  |
| 14 | -5.376668675931E+00 | -6.649999792267E+00 | -2.406798904273E+00 |
| 14 | -7.047928427466E+00 | -5.311236495025E+00 | 1.038512425766E+00  |
| 14 | -1.301324561394E+00 | -8.206123545725E+00 | -3.143029552823E+00 |
| 14 | -9.484299646991E-01 | -8.080685298101E+00 | 3.570288912585E+00  |
| 14 | 2.424989368088E-01  | -8.864143561304E+00 | 5.506779757448E-01  |
| 14 | -6.425460329401E+00 | -4.970825229751E+00 | -3.591305162192E+00 |
| 14 | -7.296754545747E+00 | -4.073336349199E+00 | 3.014130451001E+00  |
| 14 | -8.129829918008E+00 | -3.581152118427E+00 | -1.821002804205E-01 |
| 14 | 1.707804745689E-01  | -7.464497014449E+00 | -4.810678907903E+00 |
| 14 | 5.467514927934E-01  | -8.698351254806E+00 | -1.730426745912E+00 |
| 14 | 1.213592082333E+00  | -8.397789926461E+00 | 2.633558527604E+00  |
| 14 | -1.196455859052E+00 | -6.863752027283E+00 | 5.514672509077E+00  |
| 14 | -6.175643948643E+00 | -3.459758583575E+00 | -5.366905856464E+00 |
| 14 | -7.823370494066E+00 | -3.413619966140E+00 | -2.462747963718E+00 |
| 14 | -8.378259230004E+00 | -2.343272282256E+00 | 1.793962100756E+00  |
| 14 | -6.340600996132E+00 | -3.614536905156E+00 | 5.063159264207E+00  |
| 14 | 2.018662101448E+00  | -7.956683051170E+00 | -3.398279232279E+00 |
| 14 | 4.182659215677E-01  | -5.977726796045E+00 | -6.557509286915E+00 |
| 14 | 3.064076817810E+00  | -7.488947985793E+00 | 3.669428485756E+00  |
| 14 | -2.573586335371E+00 | -5.326635735630E+00 | 6.627953037400E+00  |
| 14 | 7.104818104600E-01  | -5.926328521692E+00 | 6.581371967801E+00  |
| 14 | -7.573541681093E+00 | -1.902514697705E+00 | -4.238246473917E+00 |
| 14 | -4.547335383771E+00 | -4.022770378667E+00 | -9.132958326217E+00 |
| 14 | -8.476268256769E+00 | -2.073950245781E-01 | 2.660730017523E+00  |
| 14 | -4.520109948643E+00 | -4.099547776248E+00 | 6.458972578117E+00  |
| 14 | -6.438857999886E+00 | -1.413240717398E+00 | 5.955591954615E+00  |
| 14 | 4.058416835067E+00  | -6.945874403103E+00 | -3.773024485632E+00 |
| 14 | -6.488815185034E-01 | -4.271423082396E+00 | -7.760327232897E+00 |
| 14 | 2.520377349944E+00  | -4.936384749130E+00 | -6.944439185388E+00 |
| 14 | 5.135831059804E+00  | -6.459299124247E+00 | 3.288800776385E+00  |
| 14 | 2.808888833309E+00  | -6.235499554563E+00 | 5.673670751306E+00  |
| 14 | -6.667525799007E-01 | -4.389902988007E+00 | 7.694958316635E+00  |
| 14 | -7.478920593220E+00 | 3.375839418329E-01  | -4.782355368524E+00 |
| 14 | -2.594730272442E+00 | -3.043547864232E+00 | -7.930304913832E+00 |
| 14 | -4.631980383268E+00 | -4.224774383406E-01 | -7.571427304704E+00 |
| 14 | -8.376783708663E+00 | 2.068414167454E+00  | 2.105221980815E+00  |
| 14 | -7.491358485317E+00 | 2.650239412407E-01  | 4.772825494874E+00  |
| 14 | -4.617853557349E+00 | -1.897749452155E+00 | 7.351238873445E+00  |
| 14 | 5.939240642097E+00  | -6.022123883035E+00 | -2.720450584081E+00 |
| 14 | 4.312733862196E+00  | -5.412179080227E+00 | -5.571772260746E+00 |
| 14 | 1.452785619541E+00  | -3.229547409022E+00 | -8.147134645995E+00 |
| 14 | 4.880595554387E+00  | -5.205223755142E+00 | 5.292437841260E+00  |
| 14 | 6.584064136144E+00  | -5.731564974136E+00 | 1.646972731192E+00  |
| 14 | -7.611739784595E-01 | -2.252716494672E+00 | 8.558951882413E+00  |
| 14 | -7.576470705997E+00 | 2.509259206002E+00  | -3.903460752828E+00 |
| 14 | -5.987107483119E+00 | 1.088392405747E+00  | -6.474298409155E+00 |
| 14 | -2.498809269216E+00 | -7.358423458917E-01 | -8.493188864533E+00 |
| 14 | -7.391839612144E+00 | 2.540705510028E+00  | 4.216582419614E+00  |
| 14 | -8.132828753106E+00 | 3.557139105997E+00  | 3.595851305475E-01  |
| 14 | -2.766404145525E+00 | -9.878659734786E-01 | 8.384440031613E+00  |
| 14 | 6.193538782753E+00  | -4.488761608667E+00 | -4.519708702771E+00 |
| 14 | 6.894922712534E+00  | -5.563267047703E+00 | -6.711329707872E-01 |
| 14 | 1.545889861472E+00  | -9.902093366004E-01 | -8.695025106036E+00 |
| 14 | 6.083936758266E+00  | -3.259990627625E+00 | 5.595135734392E+00  |
| 14 | 7.820871010233E+00  | -3.725442147230E+00 | 1.958095672508E+00  |
| 14 | 4.595435695784E-01  | -2.752117928024E-01 | 8.869810087746E+00  |
| 14 | -6.083936730873E+00 | 3.259990680534E+00  | -5.595135720201E+00 |
| 14 | -7.820871047618E+00 | 3.725442200457E+00  | -1.958095685297E+00 |
| 14 | -4.595435654910E-01 | 2.752118065063E-01  | -8.869810150618E+00 |
| 14 | -6.193538741573E+00 | 4.488761607922E+00  | 4.519708687740E+00  |
| 14 | -6.894922727965E+00 | 5.563267084203E+00  | 6.711329728361E-01  |
| 14 | -1.545889857942E+00 | 9.902093613016E-01  | 8.695025107585E+00  |
| 14 | 7.391839646584E+00  | -2.540705485823E+00 | -4.216582452089E+00 |
| 14 | 8.132828745144E+00  | -3.557139066125E+00 | -3.595851612811E-01 |
| 14 | 2.766404147614E+00  | 9.878659890939E-01  | -8.384440040766E+00 |
| 14 | 5.987107480422E+00  | -1.088392352644E+00 | 6.474298375091E+00  |
| 14 | 7.576470688196E+00  | -2.509259153691E+00 | 3.903460736395E+00  |
| 14 | -2.498809283497E+00 | 7.358423789845E-01  | 8.493188771402E+00  |
| 14 | -4.880595515134E+00 | 5.205223807343E+00  | -5.292437811986E+00 |
| 14 | -6.584064131849E+00 | 5.731565007621E+00  | -1.646972709561E+00 |

|    |                     |                     |                     |
|----|---------------------|---------------------|---------------------|
| 14 | 7.611740069254E-01  | 2.252716518361E+00  | -8.558951903450E+00 |
| 14 | -4.312733855124E+00 | 5.412179122308E+00  | 5.571772277406E+00  |
| 14 | -5.939240622850E+00 | 6.022123898491E+00  | 2.720450585366E+00  |
| 14 | -1.452785604620E+00 | 3.229547446115E+00  | 8.147134616190E+00  |
| 14 | 7.491358507973E+00  | -2.650239306380E-01 | -4.772825549261E+00 |
| 14 | 8.376783733472E+00  | -2.068414140926E+00 | -2.105222012728E+00 |
| 14 | 4.617853553917E+00  | 1.897749466360E+00  | -7.351238889999E+00 |
| 14 | 7.478920615381E+00  | -3.375839127443E-01 | 4.782355346110E+00  |
| 14 | 4.631980386100E+00  | 4.224774888773E-01  | 7.571427236817E+00  |
| 14 | 2.594730289513E+00  | 3.043547914098E+00  | 7.930304891100E+00  |
| 14 | -2.808888795325E+00 | 6.235499578638E+00  | -5.673670704219E+00 |
| 14 | -5.135831020986E+00 | 6.459299160336E+00  | -3.288800731733E+00 |
| 14 | 6.667526060817E-01  | 4.389903009900E+00  | -7.694958320600E+00 |
| 14 | -4.058416790091E+00 | 6.945874410446E+00  | 3.773024458800E+00  |
| 14 | -2.520377343667E+00 | 4.936384803327E+00  | 6.944439196463E+00  |
| 14 | 6.488815461625E-01  | 4.271423124078E+00  | 7.760327253139E+00  |
| 14 | 8.476268300384E+00  | 2.073950507461E-01  | -2.660730071819E+00 |
| 14 | 6.438858002007E+00  | 1.413240714737E+00  | -5.955591975419E+00 |
| 14 | 4.520109963210E+00  | 4.099547779542E+00  | -6.458972602121E+00 |
| 14 | 7.573541720023E+00  | 1.902514720867E+00  | 4.238246429801E+00  |
| 14 | 4.727951671527E+00  | 2.730529709371E+00  | 7.008647350488E+00  |
| 14 | -3.064076763674E+00 | 7.488948013817E+00  | -3.669428428940E+00 |
| 14 | -7.104817630907E-01 | 5.926328531299E+00  | -6.581371921854E+00 |
| 14 | 2.573586364680E+00  | 5.326635745771E+00  | -6.627953038161E+00 |
| 14 | -2.018662029587E+00 | 7.956683035628E+00  | 3.398279206744E+00  |
| 14 | -4.182659113558E-01 | 5.977726862234E+00  | 6.557509303897E+00  |
| 14 | 8.378259276063E+00  | 2.343272300809E+00  | -1.793962156275E+00 |
| 14 | 6.340601011139E+00  | 3.614536890109E+00  | -5.063159289197E+00 |
| 14 | 7.823370527899E+00  | 3.413619966817E+00  | 2.462747915737E+00  |
| 14 | 6.175643089586E+00  | 3.459758629119E+00  | 5.366905807443E+00  |
| 14 | -1.213592016325E+00 | 8.397789947455E+00  | -2.633558486005E+00 |
| 14 | 1.196455891765E+00  | 6.863752041458E+00  | -5.514672491933E+00 |
| 14 | -5.467514367166E-01 | 8.698351247590E+00  | 1.730426762775E+00  |
| 14 | -1.707804414659E-01 | 7.464497070351E+00  | 4.810678923668E+00  |
| 14 | 8.129829970608E+00  | 3.581152124128E+00  | 1.821002384772E-01  |
| 14 | 7.296754560995E+00  | 4.073336346647E+00  | -3.014130490054E+00 |
| 14 | 6.425460386280E+00  | 4.970825254604E+00  | 3.591305127183E+00  |
| 14 | -2.424988779162E-01 | 8.864143570366E+00  | -5.506779464473E-01 |
| 14 | 9.484300117444E-01  | 8.080685307634E+00  | -3.570288889384E+00 |
| 14 | 1.301324617760E+00  | 8.206123582206E+00  | 3.143029570908E+00  |
| 14 | 7.047928463233E+00  | 5.311236519998E+00  | -1.038512466390E+00 |
| 14 | 5.376668757869E+00  | 6.649999831071E+00  | 2.406798893553E+00  |
| 14 | 1.919563611566E+00  | 8.547055574345E+00  | -1.487660557442E+00 |
| 14 | 3.398843705149E+00  | 7.897148071861E+00  | 2.233063903524E+00  |
| 14 | 5.690850411078E+00  | 6.822016157603E+00  | 5.644493928301E-02  |
| 14 | 3.713155515746E+00  | 8.070017308597E+00  | -1.170912975412E-01 |
| 14 | -4.727951634673E+00 | -2.730529654441E+00 | -7.008647411985E+00 |
| 14 | 6.135310545048E+00  | -8.320177772197E+00 | -3.667529320922E+00 |
| 14 | 7.178016564840E+00  | -2.835537753938E+00 | 7.795033412466E+00  |
| 14 | -2.864775776646E+00 | 4.849256856842E+00  | 9.411882648886E+00  |
| 14 | -1.011097994613E+01 | 4.114589561089E+00  | -1.051139014805E+00 |
| 14 | 8.098771264625E+00  | -7.376711108982E+00 | 5.443710922642E-01  |
| 14 | -2.703281866074E+00 | -7.722961747709E+00 | 7.305124321508E+00  |
| 14 | -1.061746533022E+01 | 1.062822682342E+00  | 2.537046962341E+00  |
| 14 | -4.708920565110E+00 | 6.833659420785E+00  | -7.172577866934E+00 |
| 14 | 6.860143313039E+00  | 1.620588916528E+00  | -8.404405692456E+00 |
| 14 | 4.391433926112E+00  | 2.697276390442E-01  | 1.004795882769E+01  |
| 14 | -6.701399166472E+00 | -5.200360787426E+00 | 6.953187129760E+00  |
| 14 | -7.523356598145E+00 | -5.520005387934E+00 | -5.761169514003E+00 |
| 14 | 3.058109027936E+00  | -2.456982194735E-01 | -1.053156575495E+01 |
| 14 | 1.042329549158E+01  | 3.327558108901E+00  | -7.609202095151E-01 |
| 14 | -6.549351705476E+00 | 5.826559830240E+00  | 6.592881807353E+00  |
| 14 | -8.664436482035E+00 | -6.140647890894E+00 | 2.745559173997E+00  |
| 14 | 1.945361778337E+00  | -1.039872266285E+01 | -2.899881225215E+00 |
| 14 | 1.061746535735E+01  | -1.062822678813E+00 | -2.537046961415E+00 |
| 14 | 5.367182521777E+00  | 8.966647354440E+00  | 3.327996388600E+00  |
| 14 | -9.604447848376E+00 | 1.614602235460E+00  | -5.044097108008E+00 |
| 14 | -5.878995370396E+00 | -9.246178605840E+00 | 4.939407231247E-01  |
| 14 | 4.708920609270E+00  | -6.833659456663E+00 | 7.172577876352E+00  |
| 14 | 7.523356695957E+00  | 5.520005407671E+00  | 5.761169462261E+00  |
| 14 | -1.321779843634E+00 | 1.074041368938E+01  | -1.788006634326E+00 |
| 14 | -5.529458056198E-01 | -6.543582587543E+00 | -8.782760147267E+00 |
| 14 | -2.194071718865E+00 | -1.022489263837E+01 | 3.311031791789E+00  |
| 14 | -3.058109041179E+00 | 2.456982741857E-01  | 1.053156575269E+01  |
| 14 | -1.945361792737E+00 | 1.039872258976E+01  | 2.899881268469E+00  |
| 14 | -3.978048408732E-01 | 6.199542064179E+00  | -9.039587593976E+00 |
| 14 | 9.015874869945E+00  | -1.831578459559E+00 | -5.970827225983E+00 |
| 14 | -1.059597027261E+00 | -9.598426143413E+00 | -5.196816092085E+00 |

|    |                     |                     |                     |
|----|---------------------|---------------------|---------------------|
| 14 | -1.042329543206E+01 | -3.327558114736E+00 | 7.609202004928E-01  |
| 14 | -6.135310477400E+00 | 8.320177827686E+00  | 3.667529152003E+00  |
| 14 | 5.878995373666E+00  | 9.246178639813E+00  | -4.939407344100E-01 |
| 14 | 9.796373820489E+00  | 2.986898536254E+00  | 3.926724752642E+00  |
| 14 | 5.123273133998E+00  | -8.872835899762E+00 | 3.914221226034E+00  |
| 14 | -5.367182338054E+00 | -8.966647312010E+00 | -3.327996392616E+00 |
| 14 | -7.178016630359E+00 | 2.835537770029E+00  | -7.795033418276E+00 |
| 14 | 2.194071733466E+00  | 1.022489262687E+01  | -3.311031764265E+00 |
| 14 | 1.059597090384E+00  | 9.598426146678E+00  | 5.196816117615E+00  |
| 14 | 2.026525309179E-01  | -1.811984671249E+00 | 1.081596106522E+01  |
| 14 | 1.321779947594E+00  | -1.074041362975E+01 | 1.788006571544E+00  |
| 14 | 2.864775791807E+00  | -4.849256760798E+00 | -9.411882621677E+00 |
| 14 | 2.703281853222E+00  | 7.722961814862E+00  | -7.305124329033E+00 |
| 14 | -5.123273094288E+00 | 8.872835917383E+00  | -3.914221089722E+00 |
| 14 | -9.015874915265E+00 | 1.831578440758E+00  | 5.970827106171E+00  |
| 14 | 3.978048927983E-01  | -6.199542023814E+00 | 9.039587653314E+00  |
| 14 | 1.011097993120E+01  | -4.114589532682E+00 | 1.051139005884E+00  |
| 14 | 6.701399183819E+00  | 5.200360746810E+00  | -6.953187179768E+00 |
| 14 | -2.026524511939E-01 | 1.811984624882E+00  | -1.081596117806E+01 |
| 14 | -9.796373786810E+00 | -2.986898550743E+00 | -3.926724886839E+00 |
| 14 | -6.860143319717E+00 | -1.620588767829E+00 | 8.404405642732E+00  |
| 14 | 4.547335415382E+00  | 4.022770430975E+00  | 9.132958256667E+00  |
| 14 | 8.664436398409E+00  | 6.140647900375E+00  | -2.745559352921E+00 |
| 14 | 9.604447857116E+00  | -1.614602208885E+00 | 5.044097045902E+00  |
| 14 | 6.549351706879E+00  | -5.826559868454E+00 | -6.592881798151E+00 |
| 14 | -4.391433961890E+00 | -2.697275290628E-01 | -1.004795888711E+01 |
| 14 | -8.098771231370E+00 | 7.376711187163E+00  | -5.443710761238E-01 |
| 14 | 5.529457614071E-01  | 6.543582674604E+00  | 8.782760175103E+00  |
| 14 | 8.860896266610E+00  | -5.879081104621E+00 | 2.629762428114E+00  |
| 14 | 2.000170662131E+00  | -7.045162310923E+00 | -8.148045973452E+00 |
| 14 | -8.309961398866E+00 | 5.082333257478E-01  | -7.110289576293E+00 |
| 14 | -7.824955735245E+00 | 6.339886295106E+00  | 4.295149859065E+00  |
| 14 | 2.784266748601E+00  | 2.393895468385E+00  | 1.032024213981E+01  |
| 14 | -2.784266691159E+00 | -2.393894054926E+00 | -1.032024264261E+01 |
| 14 | -9.341959899352E+00 | -5.709252351627E+00 | 1.910134606037E-01  |
| 14 | -2.391331772063E+00 | -2.345219174428E+00 | 1.042244880888E+01  |
| 14 | 8.463145941485E+00  | 3.060595789239E+00  | 6.247602566921E+00  |
| 14 | 8.215650123445E+00  | 3.025613855066E+00  | -6.571701676211E+00 |
| 14 | -8.860896064438E+00 | 5.879081295442E+00  | -2.629762412944E+00 |
| 14 | -8.215650152885E+00 | -3.025613869987E+00 | 6.571701607160E+00  |
| 14 | 3.279672751811E+00  | -8.668295418586E+00 | 5.845788877450E+00  |
| 14 | 9.732823141684E+00  | -3.244281206327E+00 | -3.812614299459E+00 |
| 14 | 2.241771041796E+00  | 5.747884504309E+00  | -9.053451685575E+00 |
| 14 | -2.000170558668E+00 | 7.045161975287E+00  | 8.148045621346E+00  |
| 14 | -2.241772343857E+00 | -5.747885381622E+00 | 9.053451260044E+00  |
| 14 | -7.200468044723E-01 | -1.058638801961E+01 | -2.731269406371E+00 |
| 14 | 4.623468795540E-01  | -7.790231988468E-01 | -1.092090447069E+01 |
| 14 | -3.310911936668E-01 | 1.010828457545E+01  | -4.193621398533E+00 |
| 14 | 8.309961385839E+00  | -5.082332698299E-01 | 7.110289579738E+00  |
| 14 | 3.310912994268E-01  | -1.010828453452E+01 | 4.193621420818E+00  |
| 14 | -8.852483536038E+00 | -5.444715265950E+00 | -3.438402437977E+00 |
| 14 | -6.549906448818E+00 | 7.035346132076E+00  | -5.239244153266E+00 |
| 14 | 4.057234033622E+00  | 1.008688397471E+01  | 1.279348753361E+00  |
| 14 | 7.824955824461E+00  | -6.339886245999E+00 | -4.295149815761E+00 |
| 14 | -4.057233828590E+00 | -1.008688391098E+01 | -1.279348881040E+00 |
| 14 | -9.895770403851E+00 | -3.510723020690E-01 | 4.694382517441E+00  |
| 14 | -1.605712507218E+00 | 9.406980636485E+00  | 5.363577238725E+00  |
| 14 | 9.341959972437E+00  | 5.709252359046E+00  | -1.910134342300E-01 |
| 14 | 2.391331742116E+00  | 2.345219113421E+00  | -1.042244885152E+01 |
| 14 | 1.605712545944E+00  | -9.406980574399E+00 | -5.363577322859E+00 |
| 14 | -6.421523793880E-02 | -8.171258029543E+00 | 7.288137602398E+00  |
| 14 | -3.119512701537E-01 | 4.345228616563E+00  | 1.004234958130E+01  |
| 14 | 1.202721194146E+00  | 1.085314146831E+01  | -9.037740621474E-01 |
| 14 | -3.279672464767E+00 | 8.668295311716E+00  | -5.845789002959E+00 |
| 14 | -8.463146256893E+00 | -3.060595747923E+00 | -6.247602552230E+00 |
| 14 | -1.202720741428E+00 | -1.085314172769E+01 | 9.037739913200E-01  |
| 14 | 8.469173406411E+00  | -3.941949748380E+00 | 5.725796831794E+00  |
| 14 | 7.186447312536E+00  | 8.122156647057E+00  | 1.555118888614E+00  |
| 14 | 7.200464024018E-01  | 1.058638803542E+01  | 2.731268835403E+00  |
| 14 | -9.732823079509E+00 | 3.244281263764E+00  | 3.812614270257E+00  |
| 14 | -7.186447695185E+00 | -8.122157360753E+00 | -1.555118664943E+00 |
| 14 | 4.857556306851E+00  | -7.803465529697E+00 | -5.963778344932E+00 |
| 14 | 9.742644058709E+00  | 3.756728665905E+00  | -3.314654835013E+00 |
| 14 | 8.852483584392E+00  | 5.444715237201E+00  | 3.438402398243E+00  |
| 14 | -4.623475770516E-01 | 7.790235117759E-01  | 1.092090471435E+01  |
| 14 | -9.742643466552E+00 | -3.756729096320E+00 | 3.314655252597E+00  |
| 14 | -6.152112410636E+00 | -1.897770581734E+00 | -8.856563894435E+00 |
| 14 | 5.343246857584E+00  | 3.795101614026E+00  | -8.782532433390E+00 |

|    |                     |                     |                     |
|----|---------------------|---------------------|---------------------|
| 14 | 9.895770297028E+00  | 3.510726200252E-01  | -4.694381576531E+00 |
| 14 | 6.549906543293E+00  | -7.035346010039E+00 | 5.239244188621E+00  |
| 14 | -5.343247266021E+00 | -3.795102089795E+00 | 8.782532824269E+00  |
| 14 | -9.345613761428E+00 | 5.609237722522E+00  | 1.033870538923E+00  |
| 14 | 6.421524496867E-02  | 8.171258020755E+00  | -7.288137580008E+00 |
| 14 | -8.469173391478E+00 | 3.941949698170E+00  | -5.725796571780E+00 |
| 14 | 3.119512531865E-01  | -4.345228737608E+00 | -1.004234957183E+01 |
| 14 | 9.345613704548E+00  | -5.609237736442E+00 | -1.033870575983E+00 |
| 14 | 6.152112434030E+00  | 1.897770613074E+00  | 8.856563835502E+00  |
| 14 | -4.857556238303E+00 | 7.803464808382E+00  | 5.963779212038E+00  |
| 14 | 9.647086921613E+00  | -2.557869070653E+00 | 7.387752233650E+00  |
| 14 | -1.322376127263E+00 | 6.551270658929E+00  | 1.046349816120E+01  |
| 14 | -1.047504101755E+01 | 6.602474104063E+00  | -9.162314340576E-01 |
| 14 | -5.141982562766E+00 | -2.474003887681E+00 | -1.102741171169E+01 |
| 14 | 7.296680533414E+00  | -8.136771745998E+00 | -5.894420943047E+00 |
| 14 | -1.129182004843E+01 | 1.668295456604E+00  | 4.886268369790E+00  |
| 14 | -5.658206341160E+00 | 9.033479443841E+00  | -6.369395772588E+00 |
| 14 | 7.802185597189E+00  | 3.916776518375E+00  | -8.830414120120E+00 |
| 14 | 1.047504100213E+01  | -6.602474120042E+00 | 9.162313655211E-01  |
| 14 | -1.328842922738E+00 | -8.009564322999E+00 | 9.395259528924E+00  |
| 14 | -9.962621477100E+00 | -4.891196424475E+00 | -5.565979346759E+00 |
| 14 | 1.648705524139E+00  | 9.013668014695E-01  | -1.227457878417E+01 |
| 14 | 1.097905603257E+01  | 5.441200438008E+00  | -2.011220581565E+00 |
| 14 | 5.141982539770E+00  | 2.474003893005E+00  | 1.102741162980E+01  |
| 14 | -7.802186058688E+00 | -3.916776199057E+00 | 8.830414277257E+00  |
| 14 | 5.155127019550E-01  | -1.149908985879E+01 | -4.655959391649E+00 |
| 14 | 1.129181973583E+01  | -1.668295187419E+00 | -4.886268650519E+00 |
| 14 | 6.464625334458E+00  | 1.047553071669E+01  | 1.624134907928E+00  |
| 14 | -7.296680354473E+00 | 8.136771854787E+00  | 5.894420906608E+00  |
| 14 | -1.097905619348E+01 | -5.441200439431E+00 | 2.011220764903E+00  |
| 14 | 5.658206600879E+00  | -9.033479368285E+00 | 6.369395801900E+00  |
| 14 | 9.962621330836E+00  | 4.891196356951E+00  | 5.565979397420E+00  |
| 14 | 5.050425122317E-01  | 1.205450625394E+01  | -2.937167168748E+00 |
| 14 | -9.647087015915E+00 | 2.557869106859E+00  | -7.387751965875E+00 |
| 14 | -6.464625107350E+00 | -1.047553124107E+01 | -1.624134626939E+00 |
| 14 | -1.648705560436E+00 | -9.013670490146E-01 | 1.227457888804E+01  |
| 14 | -5.155125893624E-01 | 1.149908986040E+01  | 4.655959198328E+00  |
| 14 | 1.328842667739E+00  | 8.009563927763E+00  | -9.395259632926E+00 |
| 14 | 1.322375488561E+00  | -6.551271053203E+00 | -1.046349829090E+01 |
| 14 | -5.050426718349E-01 | -1.205450627142E+01 | 2.937167455558E+00  |

## P1 $\{_{\infty}^1([Si_9]-[Si_9])_n\}$

One imaginary frequency with a value of  $98i\text{ cm}^{-1}$ , which could be identified as an asymmetric rotation of the clusters along the translational axis.

|    |                     |                     |                     |
|----|---------------------|---------------------|---------------------|
| 1  | 10.79713964         | 90.000000           |                     |
| 18 |                     |                     |                     |
| 14 | 2.484969462430E-01  | -4.000998093300E-02 | -1.801971138589E+00 |
| 14 | -2.467778270744E-01 | -1.230326854390E-01 | 1.931874529975E+00  |
| 14 | -2.518907564107E-01 | 3.608879195400E-02  | -1.803234363212E+00 |
| 14 | 2.530712151211E-01  | 1.193269643240E-01  | 1.932558891712E+00  |
| 14 | 1.308765508248E-01  | 2.142132980498E+00  | -1.655471232073E+00 |
| 14 | -1.323289530740E-01 | -2.304065507786E+00 | 1.587712945631E+00  |
| 14 | -1.503696297987E-01 | -2.263503098871E+00 | -9.862782608330E-01 |
| 14 | 1.487338852284E-01  | 2.321142811865E+00  | 9.062946393000E-01  |
| 14 | 3.498503187560E-01  | 2.262648165820E+00  | -9.875396454710E-01 |
| 14 | -3.512240127558E-01 | -2.328104679652E+00 | 9.108180768500E-01  |
| 14 | -3.693745236023E-01 | -2.148146691018E+00 | -1.651476954077E+00 |
| 14 | 3.674104653515E-01  | 2.302057510228E+00  | 1.588697537389E+00  |
| 14 | -1.056407263281E-01 | -1.716886715720E-01 | 1.150738713810E-01  |
| 14 | 1.067833783511E-01  | 1.339305282230E-01  | 1.642294111000E-03  |
| 14 | -3.932699097476E-01 | -1.416120250950E-01 | 3.017907334000E-03  |
| 14 | 3.944487814299E-01  | 1.720750748560E-01  | 1.182388557910E-01  |
| 14 | 2.492260411398E-01  | 4.123779431345E+00  | -9.148622180700E-02 |
| 14 | -2.507436184496E-01 | -4.127407056649E+00 | -9.556634157800E-02 |

## P2 $\{_{\infty}^1([Si_9]=[Si_9])_n\}$

|    |                     |                     |                     |
|----|---------------------|---------------------|---------------------|
| 2  | 8.31743783          |                     |                     |
| 9  |                     |                     |                     |
| 14 | -2.507395243582E-01 | -2.016266542230E+00 | -2.774795582859E+00 |
| 14 | -4.761811865597E-01 | 2.469619641461E-02  | -2.693437367799E+00 |
| 14 | -2.497963802906E-01 | 2.067969037699E+00  | -2.738689470243E+00 |

|    |                     |                     |                     |
|----|---------------------|---------------------|---------------------|
| 14 | -2.502990866160E-01 | 3.924312791909E-02  | -4.295853454734E+00 |
| 14 | -1.092950015599E-01 | 1.213422390424E+00  | -7.129782877289E-01 |
| 14 | -1.088389048115E-01 | -1.207735596833E+00 | -7.373895817072E-01 |
| 14 | -3.907493603119E-01 | 1.223044476775E+00  | -7.127461698572E-01 |
| 14 | -2.392600808835E-02 | 2.327012368175E-02  | -2.698060983564E+00 |
| 14 | -3.903125480975E-01 | -1.197273948611E+00 | -7.292872574564E-01 |

### L1 $\{\infty[\text{Si}_9]_n\}$ -sheet

57  
10.98548258  
6

|    |                     |                    |                    |
|----|---------------------|--------------------|--------------------|
| 14 | -3.706213871906E-01 | 1.292871400050E-01 | 2.430154776020E+00 |
| 14 | -1.293041547016E-01 | 1.293041547016E-01 | 2.429200052533E+00 |
| 14 | -3.706350604866E-01 | 3.706350604866E-01 | 2.431150259183E+00 |
| 14 | -4.010764899744E-01 | 2.500205957782E-01 | 3.716651516473E-01 |
| 14 | -2.500216027438E-01 | 9.896987487642E-02 | 3.701942245505E-01 |
| 14 | -2.499373007512E-01 | 2.499373007512E-01 | 4.049986228889E+00 |

### L2 $\left\{\infty\left([\text{Si}_9]_2-\text{Si}_2\right)_n\right\}^{\text{chess}}$

1  
7.31766944 7.31951448 90.001114  
20

|    |                     |                     |                     |
|----|---------------------|---------------------|---------------------|
| 14 | 4.916422488147E-01  | -2.618784676376E-01 | 1.217384735171E+00  |
| 14 | -2.805562003437E-01 | -4.896555304942E-01 | 1.216933152305E+00  |
| 14 | 4.918449338172E-01  | 2.823761318017E-01  | 1.226521746750E+00  |
| 14 | 2.640218120969E-01  | -4.898490510557E-01 | 1.227154287920E+00  |
| 14 | 3.058557135031E-01  | -3.028104688143E-01 | 3.261344124387E+00  |
| 14 | -3.213354693916E-01 | -3.026360585787E-01 | 3.254059650664E+00  |
| 14 | -3.210250064397E-01 | 3.246216709230E-01  | 3.260520984165E+00  |
| 14 | 3.060872270716E-01  | 3.243059260203E-01  | 3.267974531936E+00  |
| 14 | 4.928814869971E-01  | -4.886756019349E-01 | 4.849432298013E+00  |
| 14 | -7.611145656545E-03 | -2.170703290330E-01 | -1.186176627696E+00 |
| 14 | 2.200042547047E-01  | 1.091505540178E-02  | -1.196125456333E+00 |
| 14 | -7.830375685800E-03 | 2.386989416043E-01  | -1.194636313080E+00 |
| 14 | -2.353919235167E-01 | 1.071158106517E-02  | -1.184175974516E+00 |
| 14 | -1.947801476447E-01 | -1.762079465341E-01 | -3.221840782701E+00 |
| 14 | 1.781059020112E-01  | -1.760072025093E-01 | -3.230265048019E+00 |
| 14 | 1.778863947923E-01  | 1.968151622322E-01  | -3.236566699383E+00 |
| 14 | -1.951407391801E-01 | 1.965416864802E-01  | -3.227733139412E+00 |
| 14 | -9.073425075884E-03 | 9.878142393523E-03  | -4.817817627675E+00 |
| 14 | -7.822550044266E-03 | -4.895412350601E-01 | 1.650125077539E-02  |
| 14 | 4.917982091703E-01  | 1.063471372963E-02  | 1.501090673167E-02  |

### L3 $\left\{\infty\left([\text{Si}_9]_2-\text{Si}_2\right)_n\right\}^{\text{on-top}}$

1  
6.31418985 6.31331903 90.014298  
20

|    |                     |                     |                     |
|----|---------------------|---------------------|---------------------|
| 14 | -1.102377586729E-01 | 2.562997818993E-01  | 1.620155910384E+00  |
| 14 | 2.381951989554E-01  | 1.128539060485E-01  | 1.621305411341E+00  |
| 14 | 9.427531875691E-02  | -2.355100071909E-01 | 1.623509040920E+00  |
| 14 | -2.542032496900E-01 | -9.207912757382E-02 | 1.622865993783E+00  |
| 14 | -2.916541787268E-01 | 1.362937366917E-01  | 3.673270370178E+00  |
| 14 | 1.176065489620E-01  | 2.943455023123E-01  | 3.673460392717E+00  |
| 14 | 2.759289147302E-01  | -1.148685670845E-01 | 3.674693678742E+00  |
| 14 | -1.335832719729E-01 | -2.733854232281E-01 | 3.674909203809E+00  |
| 14 | -7.998154950997E-03 | 1.057480024185E-02  | 5.235381605502E+00  |
| 14 | -1.106359613573E-01 | -2.355680024838E-01 | -1.591605923025E+00 |
| 14 | 2.377290606932E-01  | -9.176651297259E-02 | -1.589249982748E+00 |
| 14 | 9.425233757362E-02  | 2.565949643716E-01  | -1.588858207119E+00 |
| 14 | -2.540593520487E-01 | 1.128702640556E-01  | -1.591093568876E+00 |
| 14 | -2.919508266559E-01 | -1.147755766028E-01 | -3.643033789009E+00 |
| 14 | 1.175011021132E-01  | -2.731775669078E-01 | -3.642246881836E+00 |
| 14 | 2.757001631679E-01  | 1.361406413352E-01  | -3.641203462852E+00 |
| 14 | -1.333056708709E-01 | 2.945184040877E-01  | -3.642152786596E+00 |
| 14 | -8.013729036660E-03 | 1.065151767043E-02  | -5.204010778465E+00 |
| 14 | -8.129292893607E-03 | -4.891716498968E-01 | 1.592949873972E-02  |
| 14 | 4.921480019247E-01  | 1.032453522722E-02  | 1.547427441224E-02  |

### T<sub>4n</sub> $\{\infty[\text{Si}_9]_{4n}\}$

43  
11.12935302  
24

|    |                     |                    |                     |
|----|---------------------|--------------------|---------------------|
| 14 | -4.195731670576E-01 | 9.221210950143E+00 | 1.356929448706E+00  |
| 14 | 3.248897918819E-01  | 5.560916446768E+00 | -7.480042362284E+00 |
| 14 | 3.225533179322E-01  | 4.284725135269E+00 | 1.325520023533E+00  |
| 14 | -4.171484940954E-01 | 2.092583773650E+00 | -3.967182823146E+00 |
| 14 | 8.062677529980E-02  | 7.483017270732E+00 | -5.563440748818E+00 |
| 14 | -1.752942601426E-01 | 9.224795239552E+00 | -1.357112653461E+00 |
| 14 | 8.276107240730E-02  | 4.285909710375E+00 | -1.325805254290E+00 |
| 14 | -1.773672878478E-01 | 3.968995616556E+00 | -2.094109889252E+00 |
| 14 | -2.971959416447E-01 | 7.203402450841E+00 | 1.703896532018E+00  |
| 14 | 2.025021697419E-01  | 3.888852395002E+00 | -6.298513074451E+00 |
| 14 | 2.027567266778E-01  | 6.419886763474E+00 | 1.585813707674E+00  |
| 14 | -2.974591911617E-01 | 3.418903890427E+00 | -5.661477071824E+00 |
| 14 | 5.579246143621E-02  | 5.055509355921E+00 | -5.055509355921E+00 |
| 14 | -1.504922966838E-01 | 7.148694975428E+00 | 0.000000000000E+00  |
| 14 | 4.520553696844E-02  | 6.349016186384E+00 | 0.000000000000E+00  |
| 14 | -1.399005157998E-01 | 4.490415417003E+00 | -4.490415417003E+00 |
| 14 | -4.438680383370E-01 | 7.144554617557E+00 | 0.000000000000E+00  |
| 14 | 3.491766939885E-01  | 5.052099627894E+00 | -5.052099627894E+00 |
| 14 | 3.603536587093E-01  | 6.347503365364E+00 | 0.000000000000E+00  |
| 14 | -4.550533340569E-01 | 4.488270380398E+00 | -4.488270380398E+00 |
| 14 | -2.976218728834E-01 | 1.082564462770E+01 | 0.000000000000E+00  |
| 14 | 2.029457012751E-01  | 7.654943931586E+00 | -7.654943931586E+00 |
| 14 | 2.025610786959E-01  | 2.646798586397E+00 | 0.000000000000E+00  |
| 14 | -2.971020972948E-01 | 1.872065148282E+00 | -1.872065148282E+00 |

### $T_{6n} \{^1[\text{Si}_9]_{6n}\}$

88  
11.15376508  
24

|    |                     |                     |                    |
|----|---------------------|---------------------|--------------------|
| 14 | 8.012248850371E-02  | 7.578957728856E+00  | 1.043371604703E+01 |
| 14 | -1.783390870226E-01 | -1.346704043513E+00 | 1.282398978272E+01 |
| 14 | -1.805207772034E-01 | 5.137607372631E+00  | 6.236386222766E+00 |
| 14 | 8.234615130122E-02  | -1.331121607217E+00 | 7.968672212526E+00 |
| 14 | -4.198906221330E-01 | 1.346652880527E+00  | 1.282486150119E+01 |
| 14 | 3.216794001286E-01  | 5.245643014142E+00  | 1.177915393151E+01 |
| 14 | -4.176548631593E-01 | 2.831417695887E+00  | 7.566448699912E+00 |
| 14 | 3.194567897589E-01  | 1.331083338252E+00  | 7.969760071905E+00 |
| 14 | 2.008063778550E-01  | 6.856265425250E+00  | 8.488042942070E+00 |
| 14 | -2.991709795173E-01 | -1.693618424021E+00 | 1.077877618397E+01 |
| 14 | -2.991855608350E-01 | 6.440114680191E+00  | 7.923523816593E+00 |
| 14 | 2.008180218954E-01  | -1.615599575089E+00 | 1.008224891398E+01 |
| 14 | -4.467972026937E-01 | 2.642273446417E-20  | 1.074779957925E+01 |
| 14 | 3.484258099944E-01  | 5.373251440998E+00  | 9.306744497651E+00 |
| 14 | -4.546747337868E-01 | 5.006995411104E+00  | 8.672370445296E+00 |
| 14 | 3.563052083390E-01  | 2.492151651875E-20  | 1.001552030176E+01 |
| 14 | 5.318164614246E-02  | 5.374217958559E+00  | 9.308418555173E+00 |
| 14 | -1.515494622645E-01 | 2.642160791202E-20  | 1.074671141546E+01 |
| 14 | -1.436928550937E-01 | 5.007711015921E+00  | 8.673609909197E+00 |
| 14 | 4.534012842004E-02  | 2.491801730590E-20  | 1.001408579246E+01 |
| 14 | 2.009772193601E-01  | 7.220897710820E+00  | 1.250696171140E+01 |
| 14 | -2.990631109509E-01 | 3.392369177770E-20  | 1.444165909275E+01 |
| 14 | -2.990172720019E-01 | 3.164401081135E+00  | 5.480903448051E+00 |
| 14 | 2.009559453908E-01  | 1.742863592628E-20  | 6.328790025315E+00 |

### $T_{8n} \{^1[\text{Si}_9]_{8n}\}$

43  
11.07849622  
42

|    |                     |                    |                     |
|----|---------------------|--------------------|---------------------|
| 14 | -4.291671164472E-01 | 1.483801381946E+01 | -4.204656852881E+00 |
| 14 | 3.149680281334E-01  | 1.107389065736E+01 | -1.298622510397E+01 |
| 14 | 3.130152743053E-01  | 9.778227199979E+00 | -4.259095699392E+00 |
| 14 | -4.289312371928E-01 | 7.548611005543E+00 | -9.412570371385E+00 |
| 14 | 7.034083138017E-02  | 1.298805296027E+01 | -1.107545982092E+01 |
| 14 | -1.849476261209E-01 | 1.470795887344E+01 | -6.895973465240E+00 |
| 14 | 7.209693861307E-02  | 9.996941548628E+00 | -6.916305565809E+00 |
| 14 | -1.857136851725E-01 | 9.413684134276E+00 | -7.549648089978E+00 |
| 14 | -4.293206730077E-01 | 1.471160812251E+01 | -6.897237575709E+00 |
| 14 | 3.133790782322E-01  | 9.999581430514E+00 | -6.917264375465E+00 |
| 14 | -1.852585375677E-01 | 1.483481706679E+01 | -4.203271040304E+00 |
| 14 | 7.269310628981E-02  | 9.775414555676E+00 | -4.258108948972E+00 |
| 14 | -3.074531606699E-01 | 1.279971774465E+01 | -3.771859051637E+00 |
| 14 | 1.924926206465E-01  | 9.392283129652E+00 | -1.179614405683E+01 |

|    |                     |                     |                     |
|----|---------------------|---------------------|---------------------|
| 14 | 1.926716707910E-01  | 1.184910418557E+01  | -3.877806889200E+00 |
| 14 | -3.074905700672E-01 | 8.844601130455E+00  | -1.111192347210E+01 |
| 14 | 4.469573551681E-02  | 1.056567659599E+01  | -1.056567659599E+01 |
| 14 | -1.589570858066E-01 | 1.269624536450E+01  | -5.439517196704E+00 |
| 14 | 3.793971278088E-02  | 1.194319442136E+01  | -5.518502925492E+00 |
| 14 | -1.506410678531E-01 | 9.964025826797E+00  | -9.964025826797E+00 |
| 14 | -4.558963033305E-01 | 1.270115169377E+01  | -5.440654018589E+00 |
| 14 | 3.402857552995E-01  | 1.056353761529E+01  | -1.056353761529E+01 |
| 14 | 3.472595037925E-01  | 1.194668673613E+01  | -5.520123508469E+00 |
| 14 | -4.643253167870E-01 | 9.962673803508E+00  | -9.962673803508E+00 |
| 14 | -3.073855041195E-01 | 1.266536075689E+01  | -7.135890154047E+00 |
| 14 | 1.925085106557E-01  | 1.217620485098E+01  | -7.111938497049E+00 |
| 14 | -3.070029089744E-01 | 1.638280579579E+01  | -5.635907544042E+00 |
| 14 | 1.927659258072E-01  | 1.316975328791E+01  | -1.316975328791E+01 |
| 14 | 1.929408264294E-01  | 8.266974935693E+00  | -5.720664400865E+00 |
| 14 | -3.072233842135E-01 | 7.330376325365E+00  | -7.330376325365E+00 |
| 14 | 3.135685510795E-01  | -1.337810212734E+00 | -1.468058669347E+01 |
| 14 | -4.278641568631E-01 | -1.345258897598E+00 | -9.863153981222E+00 |
| 14 | 7.184796729421E-02  | 1.337819152794E+00  | -1.468205963127E+01 |
| 14 | -1.866943215176E-01 | 1.345153000902E+00  | -9.865346747228E+00 |
| 14 | 1.925998506705E-01  | -1.688777581421E+00 | -1.261430896531E+01 |
| 14 | -3.074323813307E-01 | -1.648625806819E+00 | -1.194013771593E+01 |
| 14 | 4.302074281136E-02  | 0.000000000000E+00  | -1.260997212001E+01 |
| 14 | -1.558839939514E-01 | 0.000000000000E+00  | -1.193118939137E+01 |
| 14 | 3.421622049740E-01  | 0.000000000000E+00  | -1.260825938381E+01 |
| 14 | -4.589780223977E-01 | 0.000000000000E+00  | -1.192815574503E+01 |
| 14 | 1.927903881651E-01  | 0.000000000000E+00  | -1.630907101751E+01 |
| 14 | -3.071773731821E-01 | 0.000000000000E+00  | -8.241376322738E+00 |

$T_{12n}\{\infty[Si_9]_{12n}\}$

88

11.06641875

42

|    |                     |                     |                      |
|----|---------------------|---------------------|----------------------|
| 14 | -4.288072819074E-01 | -2.230818273382E+01 | -7.347264974361E+00  |
| 14 | 3.141535445053E-01  | -2.340506529675E+01 | 1.342409317553E+00   |
| 14 | 3.129601840345E-01  | -1.758261746808E+01 | -6.126178713597E+00  |
| 14 | -4.276316522293E-01 | -1.852302978231E+01 | 1.336743560808E+00   |
| 14 | 7.119043406076E-02  | -2.340551449144E+01 | -1.342423062802E+00  |
| 14 | -1.857991347385E-01 | -2.297509779305E+01 | -4.7462299106277E+00 |
| 14 | 7.240155588902E-02  | -1.824603629240E+01 | -3.537077197343E+00  |
| 14 | -1.870165200223E-01 | -1.852349540226E+01 | -1.336715437992E+00  |
| 14 | -4.288005672407E-01 | -2.297599340958E+01 | -4.746354797067E+00  |
| 14 | 3.129897015793E-01  | -1.824685665832E+01 | -3.537319330690E+00  |
| 14 | -1.858037661333E-01 | -2.230737129409E+01 | -7.347215428501E+00  |
| 14 | 7.244243700394E-02  | -1.758177654888E+01 | -6.126002420088E+00  |
| 14 | -3.073618017645E-01 | -2.023153799962E+01 | -7.165995520949E+00  |
| 14 | 1.926426103740E-01  | -2.134851498632E+01 | 1.682584852655E+00   |
| 14 | 1.926410420919E-01  | -1.953027139054E+01 | -6.945859102214E+00  |
| 14 | -3.073583881554E-01 | -2.061293392647E+01 | 1.645426141331E+00   |
| 14 | 4.317729342213E-02  | -2.132937999458E+01 | 1.639728216645E-19   |
| 14 | -1.579724468954E-01 | -2.063009131605E+01 | -5.530156698715E+00  |
| 14 | 3.926544785022E-02  | -1.990545645259E+01 | -5.344287757349E+00  |
| 14 | -1.540603090605E-01 | -2.058070234477E+01 | 1.724980633927E-19   |
| 14 | -4.567476433420E-01 | -2.063116309902E+01 | -5.530323523491E+00  |
| 14 | 3.421065446280E-01  | -2.132879653025E+01 | 1.639921006185E-19   |
| 14 | 3.460134992836E-01  | -1.990655420194E+01 | -5.344524501888E+00  |
| 14 | -4.606561869577E-01 | -2.058007898007E+01 | 1.725301505705E-19   |
| 14 | -3.073536849170E-01 | -2.106833624262E+01 | -3.905186967779E+00  |
| 14 | 1.926380003371E-01  | -2.034704046393E+01 | -3.759192517339E+00  |
| 14 | -3.072593405522E-01 | -2.421114941139E+01 | -6.450088387726E+00  |
| 14 | 1.926936291533E-01  | -2.502609461457E+01 | 1.251800315353E-19   |
| 14 | 1.927427895847E-01  | -1.633332311211E+01 | -4.425720177891E+00  |
| 14 | -3.073013121950E-01 | -1.689136172534E+01 | 2.114091435496E-19   |
| 14 | 3.142607749676E-01  | -1.964974491567E+01 | 1.289533847955E+01   |
| 14 | -4.275134279321E-01 | -1.542611234500E+01 | 1.044909777417E+01   |
| 14 | 7.121449955636E-02  | -2.099382684828E+01 | 1.057025183971E+01   |
| 14 | -1.870194789229E-01 | -1.676351420459E+01 | 8.135643737131E+00   |
| 14 | 1.926389988875E-01  | -1.769954641408E+01 | 1.216316632244E+01   |
| 14 | -3.073662152952E-01 | -1.708352681546E+01 | 1.176170950627E+01   |
| 14 | 4.331668697435E-02  | -1.852437160060E+01 | 1.069505093018E+01   |
| 14 | -1.539056647100E-01 | -1.787628148988E+01 | 1.032087593029E+01   |
| 14 | 3.419545241657E-01  | -1.852271807449E+01 | 1.069409626643E+01   |
| 14 | -4.608258333718E-01 | -1.787457566396E+01 | 1.031989107124E+01   |
| 14 | 1.928114003971E-01  | -2.172491709650E+01 | 1.254288673379E+01   |
| 14 | -3.071871123605E-01 | -1.468095071580E+01 | 8.476050847727E+00   |

**[Si<sub>9</sub>]<sup>4-</sup>** calculated at the PBE0<sup>4</sup>/def2-TZVP/PCM level of theory with the Gaussian09 program package.

|    |          |          |          |
|----|----------|----------|----------|
| Si | -0.00013 | -0.00004 | 2.28609  |
| Si | -0.02223 | 1.85979  | 0.71668  |
| Si | -1.21581 | 1.20414  | -1.30594 |
| Si | -1.86219 | 0.00997  | 0.71922  |
| Si | -1.24724 | -1.25248 | -1.26819 |
| Si | 1.20929  | -1.20741 | -1.30721 |
| Si | 1.24088  | 1.24928  | -1.27162 |
| Si | 1.85910  | -0.01149 | 0.71586  |
| Si | 0.01929  | -1.86129 | 0.71832  |

**[Ge<sub>9</sub>]<sup>4-</sup>** calculated at the PBE0<sup>4</sup>/def2-TZVP/PCM level of theory with the Gaussian09 program package.

|    |          |          |          |
|----|----------|----------|----------|
| Ge | -0.02562 | 1.99866  | 0.76355  |
| Ge | -1.98755 | 0.01916  | 0.76223  |
| Ge | 2.01007  | -0.01937 | 0.77684  |
| Ge | 0.04959  | -1.99781 | 0.77575  |
| Ge | 1.34199  | 1.32981  | -1.32835 |
| Ge | -1.26468 | 1.26584  | -1.39508 |
| Ge | 1.30086  | -1.27585 | -1.37926 |
| Ge | -1.30478 | -1.34100 | -1.32986 |
| Ge | 0.00499  | 0.00560  | 2.40771  |
